# Supplementary material for: Cranberry Proanthocyanidins Mitigate Reflux-Induced Transporter Dysregulation in an Esophageal Adenocarcinoma Model
Source: MDPI journal article supplement (doi:10.3390/ph16121697), 2023-12-07
Supplement: s1 [file s1]

**Table S1.** Top Go processes significantly dysregulated in EAC tissues compared to normal esophageal tissues from non-cancer patients.

| GO Processes (Top 35/283)                                  | Total | In Data | P-value   | FDR       |
|------------------------------------------------------------|-------|---------|-----------|-----------|
| Primary metabolic process                                  | 5035  | 3006    | 3.202E-18 | 4.476E-14 |
| Nitrogen compound metabolic process                        | 4711  | 2814    | 2.076E-16 | 1.451E-12 |
| Metabolic process                                          | 5728  | 3367    | 3.890E-15 | 1.813E-11 |
| Organic substance metabolic process                        | 5457  | 3205    | 2.302E-13 | 8.046E-10 |
| Macromolecule metabolic process                            | 4301  | 2557    | 1.448E-12 | 4.050E-09 |
| Macromolecule modification                                 | 1937  | 1209    | 3.243E-12 | 7.556E-09 |
| Protein modification process                               | 1852  | 1154    | 2.394E-11 | 4.782E-08 |
| Nucleobase-containing compound metabolic process           | 2191  | 1345    | 1.336E-10 | 2.334E-07 |
| Cellular metabolic process                                 | 4361  | 2572    | 2.438E-10 | 3.787E-07 |
| Cellular nitrogen compound metabolic process               | 2585  | 1568    | 3.396E-10 | 4.455E-07 |
| Regulation of nitrogen compound metabolic process          | 4131  | 2442    | 3.505E-10 | 4.455E-07 |
| Heterocycle metabolic process                              | 2338  | 1425    | 5.386E-10 | 6.275E-07 |
| Organelle organization                                     | 2195  | 1341    | 9.463E-10 | 1.018E-06 |
| Regulation of primary metabolic process                    | 4281  | 2521    | 1.228E-09 | 1.226E-06 |
| RNA metabolic process                                      | 1355  | 852     | 1.700E-09 | 1.584E-06 |
| Cellular response to stress                                | 1506  | 940     | 1.887E-09 | 1.649E-06 |
| Cell cycle                                                 | 1025  | 655     | 4.588E-09 | 3.773E-06 |
| Regulation of cellular metabolic process                   | 4097  | 2410    | 8.962E-09 | 6.961E-06 |
| Nucleic acid metabolic process                             | 1780  | 1093    | 1.358E-08 | 9.991E-06 |
| Regulation of cell cycle                                   | 1090  | 689     | 2.474E-08 | 1.730E-05 |
| Organonitrogen compound metabolic process                  | 3499  | 2069    | 3.183E-08 | 2.119E-05 |
| Cellular aromatic compound metabolic process               | 2398  | 1443    | 5.287E-08 | 3.360E-05 |
| Protein metabolic process                                  | 2737  | 1634    | 8.731E-08 | 5.308E-05 |
| Regulation of metabolic process                            | 4901  | 2846    | 1.363E-07 | 7.943E-05 |
| Positive regulation of nitrogen compound metabolic process | 2762  | 1646    | 1.488E-07 | 8.322E-05 |
| Epithelium development                                     | 1168  | 729     | 1.886E-07 | 9.897E-05 |
| Mitotic cell cycle                                         | 649   | 422     | 1.997E-07 | 9.897E-05 |
| Renal system development                                   | 395   | 268     | 2.029E-07 | 9.897E-05 |
| Tube development                                           | 1095  | 686     | 2.053E-07 | 9.897E-05 |
| Regulation of macromolecule biosynthetic process           | 2848  | 1690    | 4.541E-07 | 2.116E-04 |
